# Supplementary material for: A lanthanide functionalized MOF hybrid for ratiometric luminescence detection of an anthrax biomarker
Source: Royal Society of Chemistry journal article supplement (doi:10.1039/c7ce01994g), 2018-01-01
Supplement: c7ce01994g1.pdf [file c7ce01994g1.pdf]

## SUPPLEMENTARY INFORMATIONS

### **A lanthanide functionalized MOF hybrid for ratiometric luminescent detection of an anthrax biomarker**

Denan Zhang,<sup>a</sup> You Zhou,<sup>\*a</sup> Jing Cuan,<sup>b</sup> Ning Gan

<sup>a</sup> Faculty of Materials Science and Chemical Engineering, Ningbo University, Ningbo 315211, Zhejiang, China. E-mail: [zhouyou@nbu.edu.cn](mailto:zhouyou@nbu.edu.cn), [ganning@nbu.edu.cn](mailto:ganning@nbu.edu.cn).

<sup>b</sup> Institute for Superconducting & Electronic Materials, School of Mechanical, Materials and Mechatronics Engineering, University of Wollongong, Wollongong, NSW 2522, Australia.

\* Corresponding Author, E-mail: [zhouyou@nbu.edu.cn](mailto:zhouyou@nbu.edu.cn)

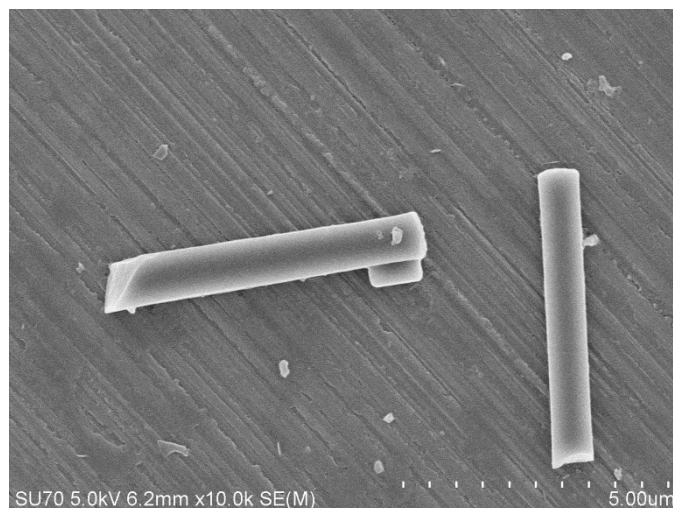

**Figure S1.** SEM images of  $Tb^{3+}@1$  microcrystalline rods.

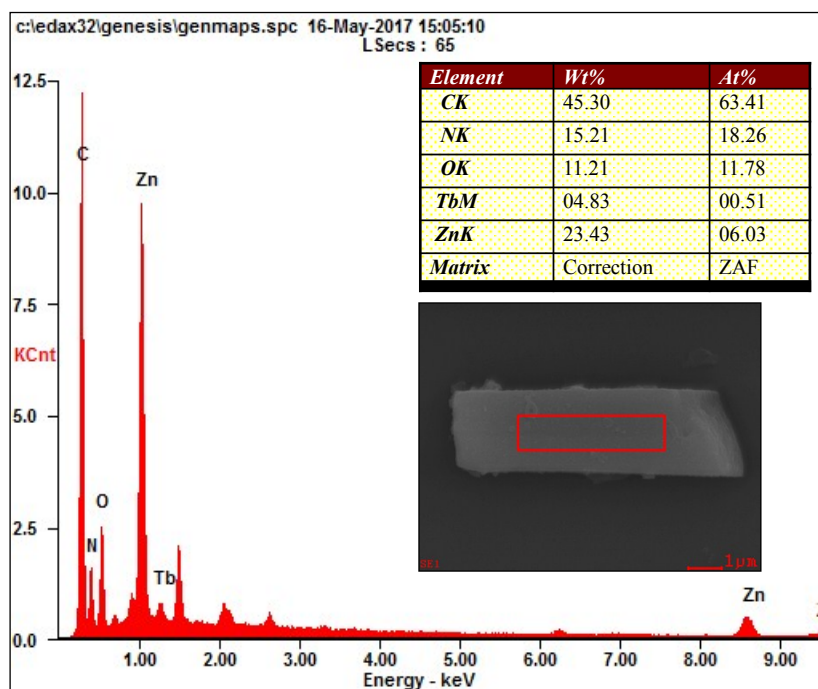

**Figure S2.** EDS spectrum of  $Tb^{3+}@1$ . The spectrum was recorded in the region marking with a red square on the microcrystal of  $Tb^{3+}@1$ , which is shown in the inset. The Table in the inset is results of mass ratios (Wt%) and atomic ratios (At%) of the elements.

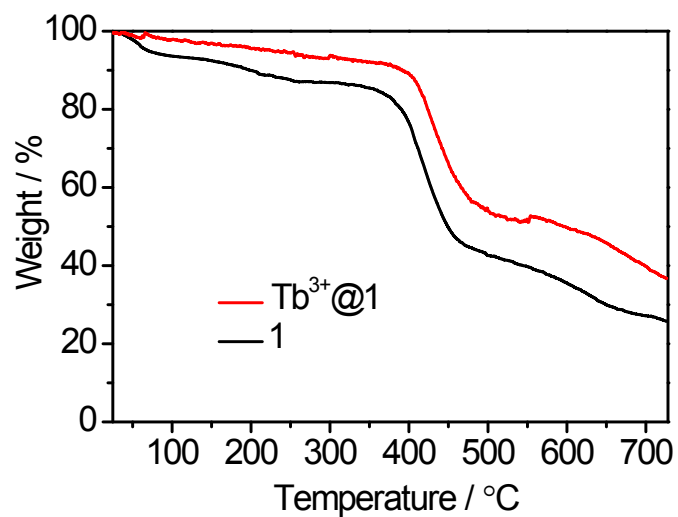

**Figure S3.** TGA curves of pristine 1 (black) and Tb<sup>3+</sup>@1 (red).

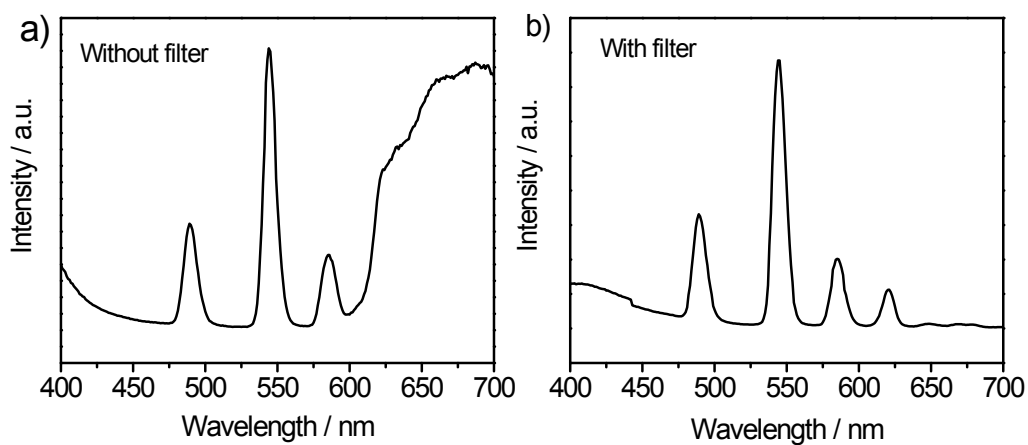

**Figure S4.** Emission spectra of Tb<sup>3+</sup>@1 recorded without (a) and with (b) using a high-pass filter (400 nm). Both of the emission spectra are collected at the range of 400-700 nm.

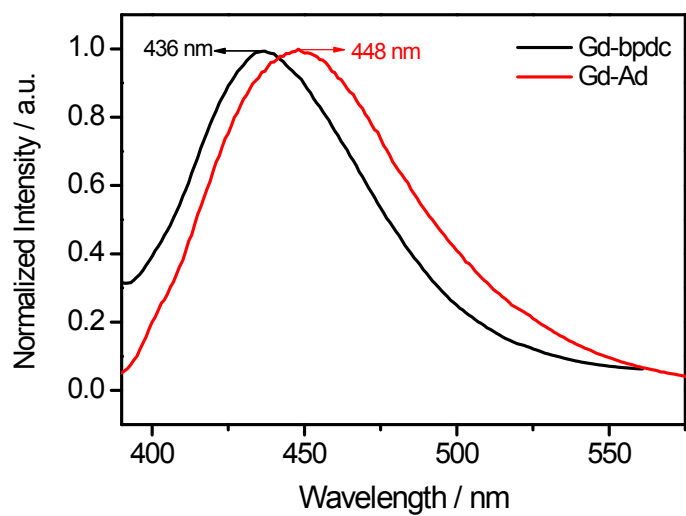

Figure S5. The phosphorescent spectra Gd-Ad (Ad, Adenine) and Gd-bpdc (bpdc, 4,4'-biphenyldicarboxylic) complexes recorded at 77 K.

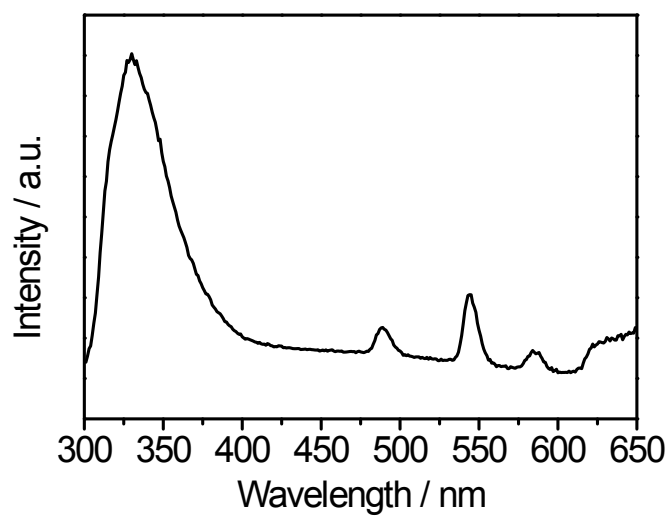

Figure S6. The photoluminescence emission spectrum of  $\text{Tb}^{3+}@1$  aqueous suspension.

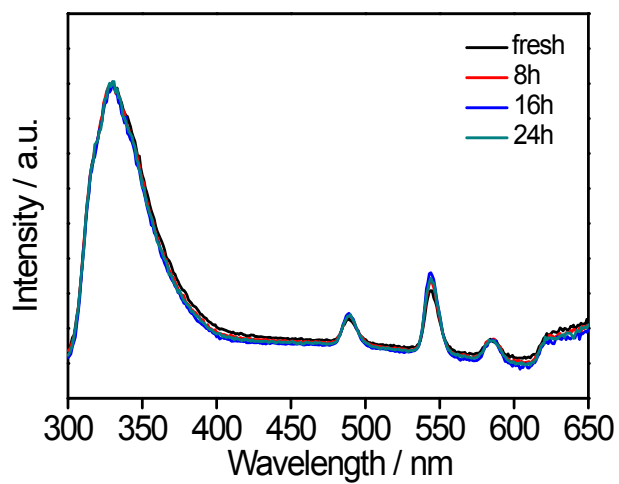

**Figure S7.** Time-dependent emission spectra of Tb<sup>3+</sup>@1 aqueous suspension.

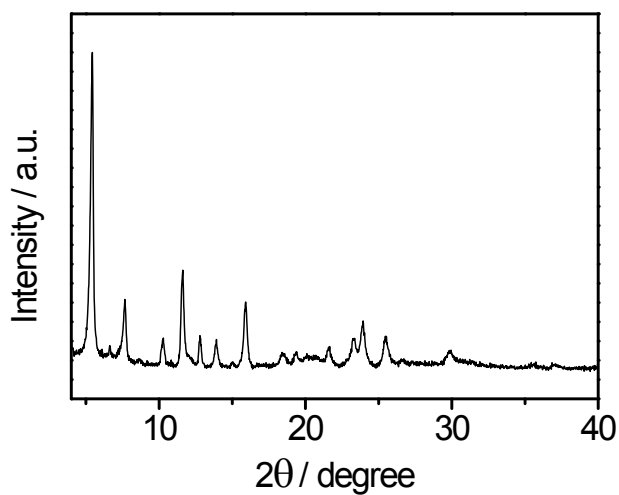

**Figure S8.** PXRD pattern of the Tb<sup>3+</sup>@1 sample after immersing in water for 24 h.

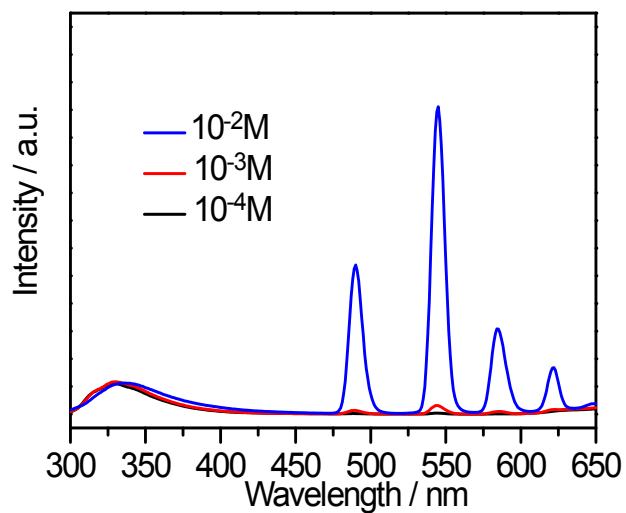

**Figure S9.** Emission spectra ( $\lambda_{\text{ex}} = 280 \text{ nm}$ ) of the  $\text{Tb}^{3+}@1$  products obtained with different feeding concentration ( $10^{-4}$ ,  $10^{-3}$ ,  $10^{-2} \text{ M}$ ) of  $\text{TbCl}_3$ .

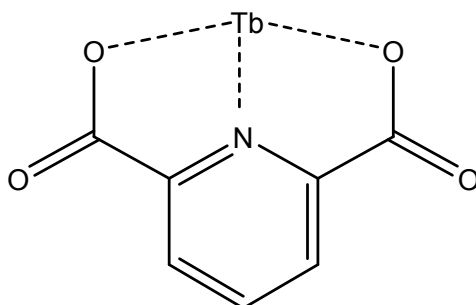

**Figure S10.** Schematic illustration of the chelation between DPA molecule and  $\text{Tb}^{3+}$ .

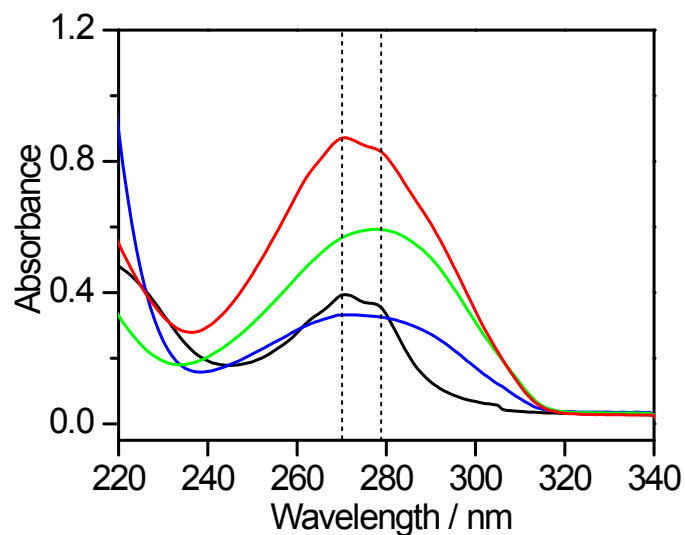

**Figure S11.** UV-vis spectra of DPA (black), pristine **1** (blue), Tb<sup>3+</sup>@**1** (green) and the thoroughly washed Tb<sup>3+</sup>@**1** (red) upon contacting with DPA.

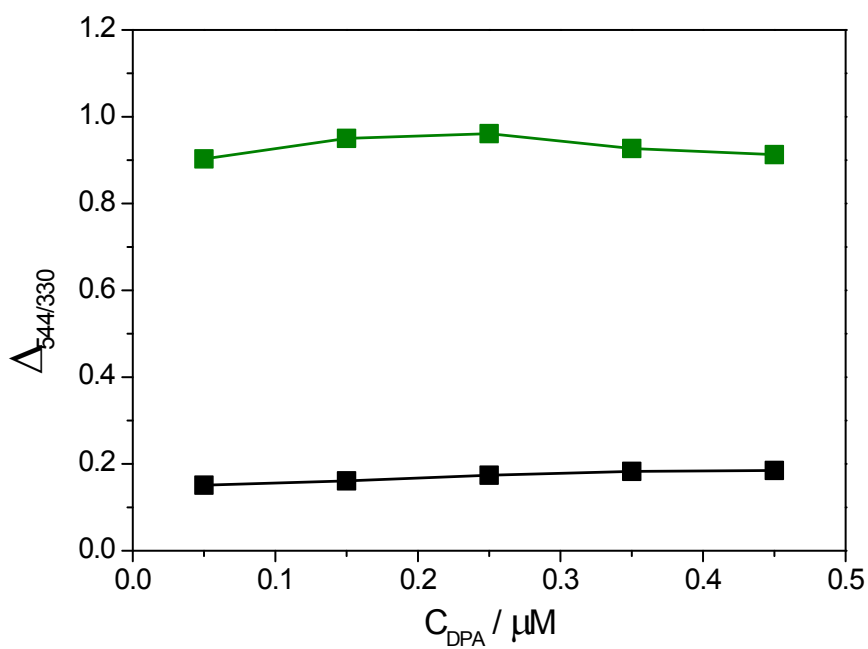

**Figure S12.** Emission intensity ratios ( $\Delta_{544/330}$ ) of various concentrations of Tb<sup>3+</sup>@**1** in the presence (green) and absence (black) of DPA (1 μM).

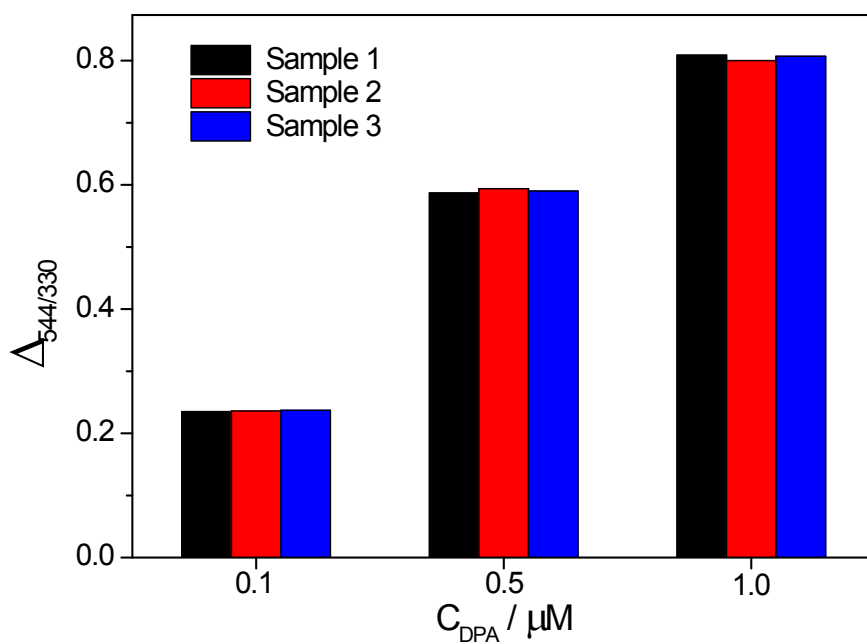

**Figure S13.** Emission intensity ratios ( $\Delta_{544/330}$ ) of the  $Tb^{3+}@1$  prepared from different batches in different concentration of DPA.

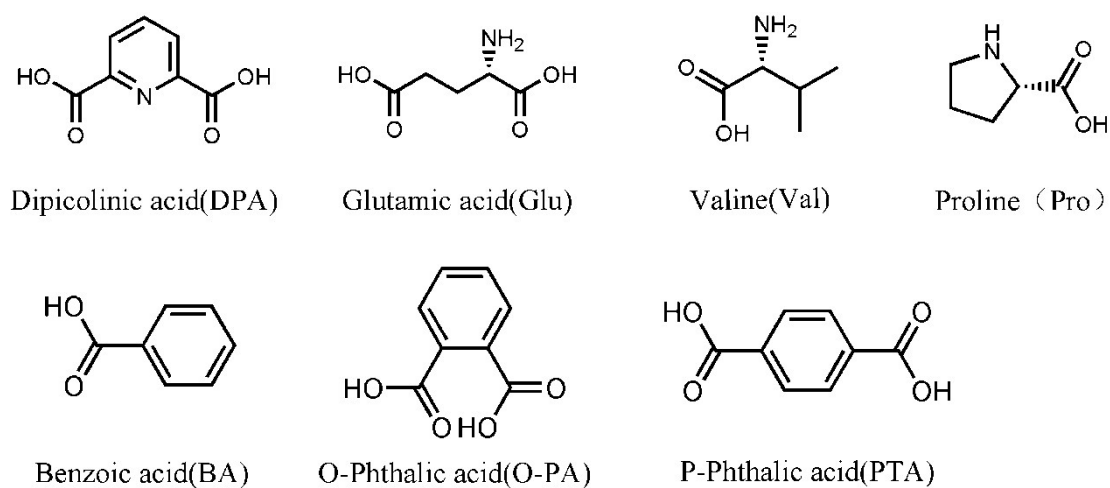

**Figure S14.** The molecular structures of DPA and interfering species used in this study.



**Table S1.** Detection of DPA in serum samples.

| Added (nM) | Founded (nM) | Recovery (%) | RSD (n = 3) (%) |
|------------|--------------|--------------|-----------------|
| 20         | 20.71 ± 0.26 | 103.55       | 1.25            |
| 100        | 109.4 ± 0.45 | 109.40       | 0.41            |
| 200        | 191.2 ± 0.35 | 95.60        | 0.18            |
